# Supplementary material for: Functional screening in human HSPCs identifies optimized protein-based enhancers of Homology Directed Repair
Source: PubMed Central journal article supplement (PMC10960832; doi:10.1038/s41467-024-46816-5), 2024-03-23

## Supplementary Data 1: Intact Mass Analysis by LC-MS

The data in this supplement was generated by JadeBio, Inc. and is reported here as is.

LC-MS without reduction and deglycosylation.

### Summary of data

| Tube Label | Sample Name   | Intact Mass (Da) |          |
|------------|---------------|------------------|----------|
|            |               | Measured         | Expected |
| 3          | GraphiteBio_3 | 8705.58          | 8550.79  |
| 4          | GraphiteBio_4 | 13899.39         | 13896.58 |
| 5          | GraphiteBio_5 | 8780.91          | 8762.01  |
| 6          | GraphiteBio_6 | 8349.28; 8532.20 | 8646.99  |

### Measured Intact Mass for GraphiteBio\_3

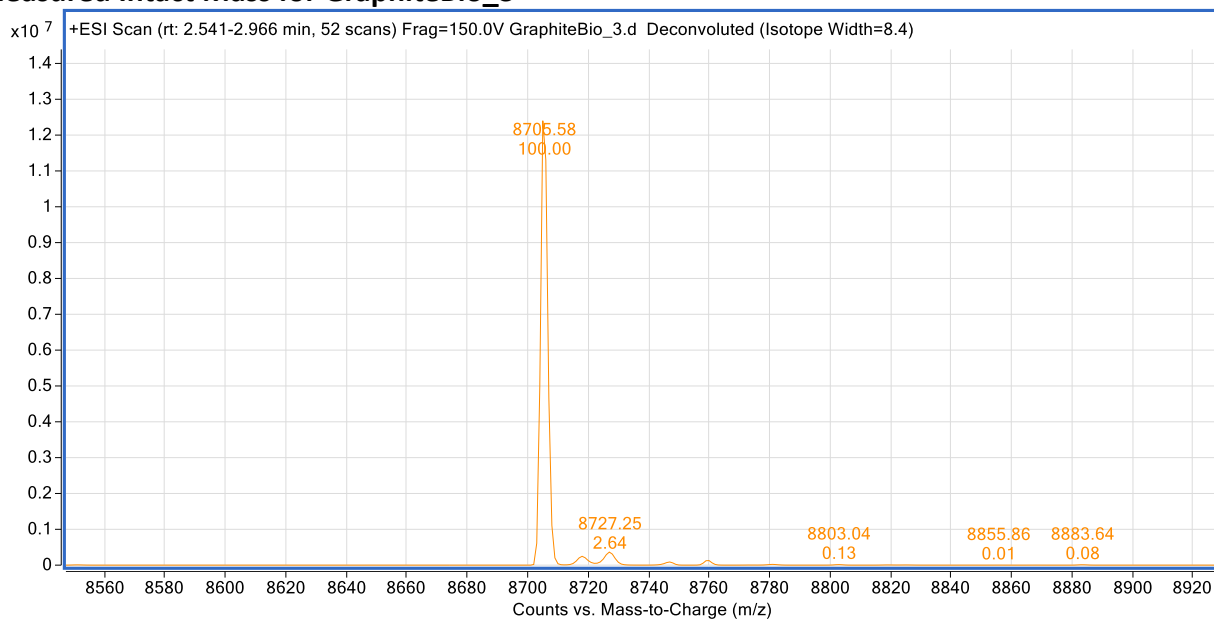

### Measured Intact Mass for GraphiteBio\_4

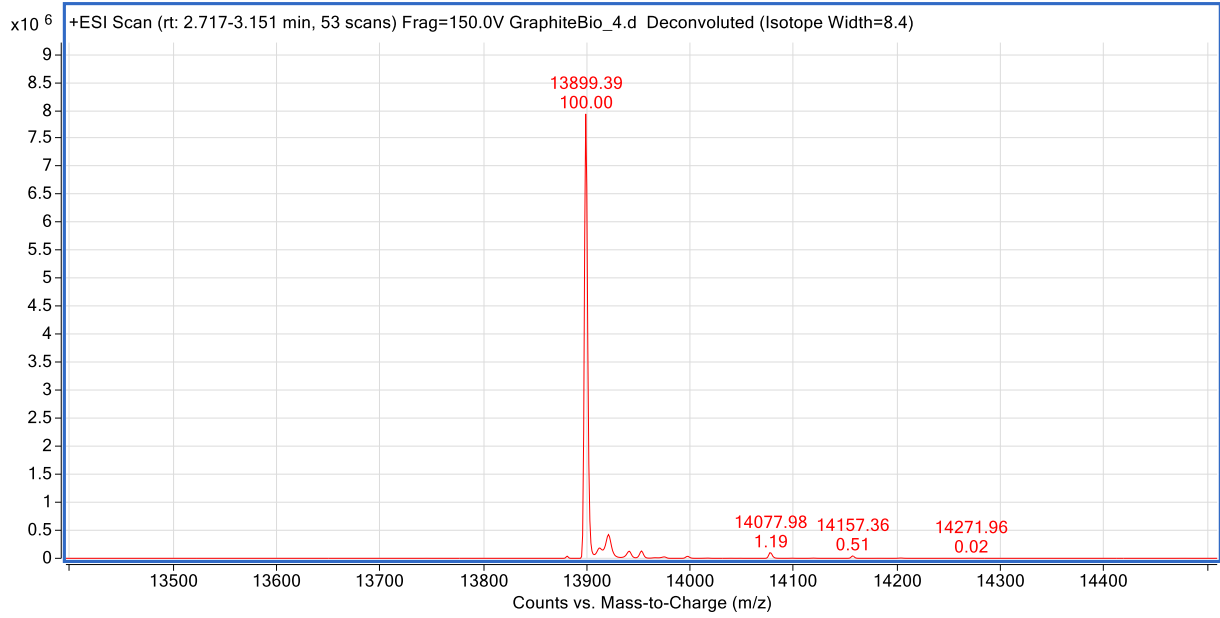

### Measured Intact Mass for GraphiteBio\_5

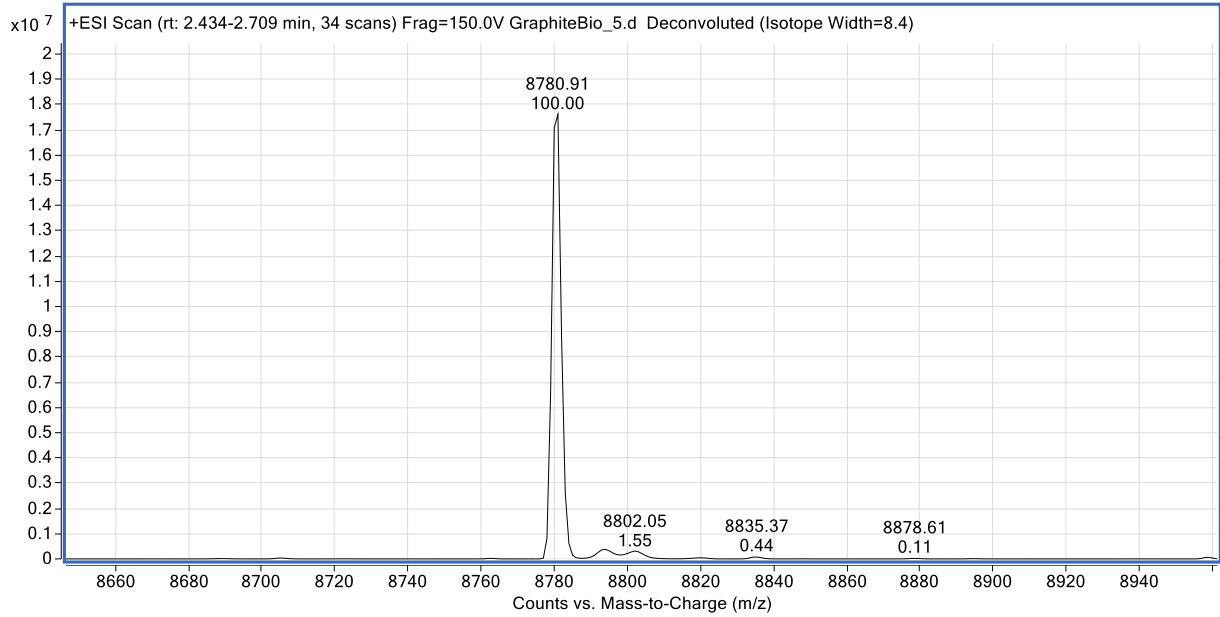

# Measured Intact Mass for GraphiteBio\_6

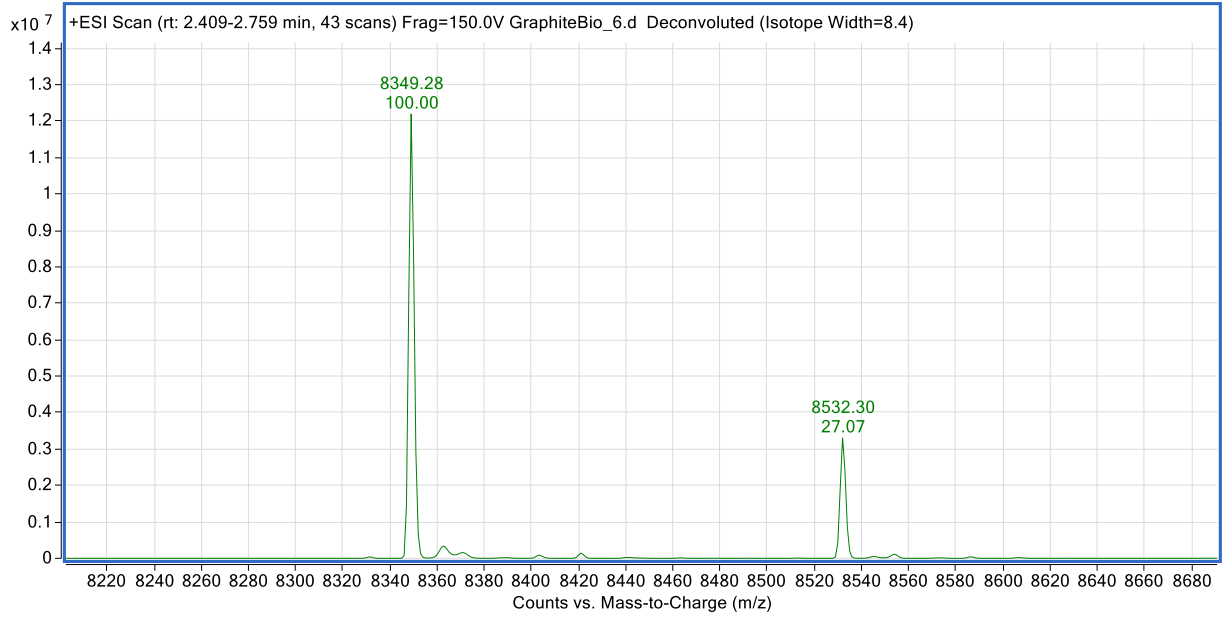

Supplement: 41467_2024_46816_MOESM4_ESM.pdf [file 41467_2024_46816_MOESM4_ESM.pdf]
